# Supplementary material for: N6-Methyladenosine-Related Long Non-coding RNA Signature Associated With Prognosis and Immunotherapeutic Efficacy of Clear-Cell Renal Cell Carcinoma
Source: Front Genet. 2021 Oct 15;12:726369. doi: 10.3389/fgene.2021.726369 (PMC8554127; doi:10.3389/fgene.2021.726369)
Supplement: Supplementary file 1 [file Table2.XLSX]

## Sheet: Sheet1
Table S2. The 239 m6A-related lncRNAs and their associated m6A genes
m6A	lncRNA	cor	pvalue	Regulation
RBM15	MADD-AS1	0.730428	5.66263e-91	postive
RBM15	AC090948.2	0.748428	7.77554e-98	postive
RBM15	AC103739.2	0.71113	3.30553e-84	postive
RBM15	AP000753.2	0.70334	1.24361e-81	postive
RBM15	AC087276.3	0.78106	6.73306e-112	postive
METTL3	AC012615.6	0.717829	1.71604e-86	postive
RBM15	AC116903.2	0.723928	1.24845e-88	postive
METTL3	AC245052.4	0.722186	5.16065e-88	postive
RBM15	BACH1-AS1	0.745407	1.20946e-96	postive
RBM15	AP000919.2	0.726291	1.78682e-89	postive
RBM15	BACH1-IT2	0.72347	1.81466e-88	postive
RBM15	AC007878.1	0.75497	1.77912e-100	postive
RBM15	DLEU2	0.753024	1.10709e-99	postive
RBM15	LINC01515	0.726254	1.84278e-89	postive
RBM15	AL139807.1	0.733603	3.82897e-92	postive
RBM15	EFCAB14-AS1	0.740281	1.1676e-94	postive
RBM15	AL159972.1	0.720236	2.49766e-87	postive
RBM15	LINC02157	0.754758	2.17289e-100	postive
RBM15	AL158071.5	0.706516	1.13456e-82	postive
RBM15	AC005920.2	0.716504	4.91835e-86	postive
RBM15	AC021739.4	0.705392	2.65786e-82	postive
RBM15	AL162274.1	0.706929	8.28872e-83	postive
RBM15	LINC00630	0.740317	1.13129e-94	postive
RBM15	AC073569.1	0.725934	2.40077e-89	postive
RBM15	AC084032.1	0.713564	4.97491e-85	postive
RBM15	AC131391.1	0.702855	1.78829e-81	postive
RBM15	NFIA-AS1	0.701182	6.21395e-81	postive
RBM15	BACH1-IT1	0.707203	6.72943e-83	postive
METTL3	SNHG10	0.736935	2.17538e-93	postive
RBM15	AC092162.2	0.727351	7.4236e-90	postive
RBM15	AL049840.7	0.722131	5.39637e-88	postive
RBM15	AC093864.1	0.742208	2.12258e-95	postive
RBM15	AC017101.1	0.778526	1.0126e-110	postive
METTL3	AL928654.2	0.802158	2.36506e-122	postive
RBM15	AP001020.3	0.721681	7.77476e-88	postive
RBM15	SCARNA9	0.751843	3.33049e-99	postive
RBM15	AC007601.2	0.741861	2.88716e-95	postive
RBM15	AC015971.1	0.778973	6.29307e-111	postive
RBM15	AC008937.2	0.728467	2.92988e-90	postive
RBM15	AC093423.2	0.716667	4.32264e-86	postive
RBM15	SHANK2-AS2	0.712421	1.21367e-84	postive
RBM15	AC009305.1	0.730915	3.75483e-91	postive
RBM15	AL158212.1	0.709294	1.36115e-83	postive
RBM15	AL590006.1	0.734706	1.48851e-92	postive
RBM15	AC011752.1	0.758447	6.49295e-102	postive
RBM15	U73169.1	0.71239	1.24271e-84	postive
METTL3	AL365330.1	0.730251	6.57203e-91	postive
METTL3	LINC00115	0.705466	2.51278e-82	postive
RBM15	AC073046.1	0.74703	2.78159e-97	postive
RBM15	AC025423.1	0.75645	4.3764e-101	postive
RBM15	KLF7-IT1	0.761499	3.38849e-103	postive
RBM15	RORA-AS1	0.738322	6.50761e-94	postive
RBM15	AL136115.1	0.731097	3.21938e-91	postive
RBM15	AC124283.3	0.719188	5.79346e-87	postive
RBM15	AC068790.7	0.748667	6.24442e-98	postive
RBM15	ARHGAP26-IT1	0.711171	3.20188e-84	postive
RBM15	AC008737.1	0.703851	8.48199e-82	postive
RBM15	AC099811.1	0.703422	1.1695e-81	postive
RBM15	AC008659.1	0.722736	3.30217e-88	postive
RBM15	ERI3-IT1	0.729281	1.48305e-90	postive
METTL3	PSMA3-AS1	0.79404	3.47435e-118	postive
RBM15	AP005131.4	0.746207	5.87038e-97	postive
RBM15	EDRF1-AS1	0.723429	1.87596e-88	postive
RBM15	AC096708.2	0.712511	1.13102e-84	postive
RBM15	MAST4-AS1	0.723607	1.62223e-88	postive
METTL3	AL135999.1	0.790441	2.13297e-116	postive
RBM15	ALG13-AS1	0.706552	1.10385e-82	postive
RBM15	AC007347.1	0.700302	1.19297e-80	postive
RBM15	USP12-AS1	0.727528	6.40772e-90	postive
METTL3	AL136295.7	0.748514	7.18819e-98	postive
RBM15	DLEU2L	0.733459	4.33137e-92	postive
RBM15	AC068790.5	0.703123	1.46276e-81	postive
METTL3	AL096870.2	0.747602	1.65295e-97	postive
RBM15	AL049869.3	0.720037	2.9316e-87	postive
RBM15	AL035658.1	0.707264	6.42534e-83	postive
METTL3	AL162586.1	0.729104	1.72032e-90	postive
RBM15	AC010285.1	0.729193	1.59732e-90	postive
RBM15	AC022726.1	0.726036	2.20613e-89	postive
RBM15	MIRLET7A1HG	0.731442	2.4043e-91	postive
RBM15	AC004223.4	0.729734	1.01463e-90	postive
RBM15	AC092839.2	0.721319	1.04257e-87	postive
RBM15	AC007598.2	0.729788	9.69848e-91	postive
RBM15	LINC02605	0.712642	1.02132e-84	postive
RBM15	AL603756.1	0.702639	2.1003e-81	postive
RBM15	AC103739.1	0.725331	3.94622e-89	postive
RBM15	AC005070.3	0.712781	9.16549e-85	postive
RBM15	AP005131.6	0.743877	4.78744e-96	postive
RBM15	WASHC5-AS1	0.705562	2.33694e-82	postive
RBM15	AL008718.3	0.72214	5.35743e-88	postive
RBM15	AC098798.1	0.750648	1.00873e-98	postive
RBM15	AL035416.1	0.709333	1.32036e-83	postive
METTL3	LINC00342	0.70601	1.66475e-82	postive
RBM15	AC022272.1	0.737792	1.03297e-93	postive
METTL3	ARHGAP27P1-BPTFP1-KPNA2P3	0.702332	2.64229e-81	postive
RBM15	LINC02863	0.75114	6.39815e-99	postive
RBM15	AC018752.1	0.734456	1.84467e-92	postive
RBM15	AL035071.2	0.70917	1.49694e-83	postive
RBM15	CELF2-AS1	0.735777	5.92359e-93	postive
RBM15	AC007906.1	0.733049	6.14406e-92	postive
RBM15	AC087286.1	0.741885	2.82745e-95	postive
RBM15	AC009948.2	0.708645	2.23913e-83	postive
RBM15	AL365356.1	0.719041	6.52085e-87	postive
RBM15	HCG18	0.752144	2.51783e-99	postive
METTL3	RAD51-AS1	0.789617	5.40988e-116	postive
RBM15	AL590729.1	0.723203	2.2559e-88	postive
RBM15	LANCL1-AS1	0.729475	1.26049e-90	postive
METTL3	AC005519.1	0.781646	3.57553e-112	postive
RBM15	AC079209.2	0.755289	1.31602e-100	postive
RBM15	AC124312.3	0.7378	1.02596e-93	postive
RBM15	AC004918.5	0.713828	4.04601e-85	postive
RBM15	AC134349.1	0.767309	1.08345e-105	postive
RBM15	AC053527.2	0.740717	7.94943e-95	postive
RBM15	AC253536.3	0.727511	6.50117e-90	postive
METTL3	AC022150.2	0.700759	8.50174e-81	postive
RBM15	AC007496.1	0.730853	3.95585e-91	postive
RBM15	FGF14-AS1	0.744366	3.08802e-96	postive
METTL3	AC090589.3	0.727991	4.36052e-90	postive
RBM15	AC005746.1	0.700702	8.87251e-81	postive
RBM15	CPEB2-DT	0.73069	4.53905e-91	postive
RBM15	AC093732.1	0.75356	6.70037e-100	postive
RBM15	AC099811.5	0.725645	3.04747e-89	postive
RBM15	PCA3	0.723071	2.51184e-88	postive
RBM15	AF230666.1	0.716987	3.35216e-86	postive
RBM15	STARD13-AS	0.756141	5.8699e-101	postive
RBM15	AC010186.3	0.737884	9.52909e-94	postive
RBM15	MIR29B2CHG	0.707303	6.23817e-83	postive
RBM15	AC068790.2	0.759515	2.32233e-102	postive
RBM15	AC007000.4	0.707438	5.62851e-83	postive
RBM15	AC046158.2	0.747547	1.73785e-97	postive
RBM15	AC087749.2	0.710019	7.79073e-84	postive
RBM15	ADAMTSL4-AS1	0.77883	7.32981e-111	postive
METTL3	AC004148.1	0.77443	7.50526e-109	postive
RBM15	AC073130.2	0.707338	6.07333e-83	postive
RBM15	AC008937.3	0.701248	5.91908e-81	postive
RBM15	AC010761.3	0.75656	3.94118e-101	postive
METTL3	AC114730.3	0.725256	4.198e-89	postive
RBM15	AC068790.4	0.713313	6.05292e-85	postive
RBM15	AL590723.1	0.72606	2.16242e-89	postive
RBM15	AL161725.1	0.70642	1.21999e-82	postive
RBM15	AC087286.4	0.751652	3.97841e-99	postive
RBM15	AC008906.2	0.702707	1.99632e-81	postive
RBM15	AL138963.1	0.717903	1.61825e-86	postive
RBM15	LYST-AS1	0.712397	1.23616e-84	postive
RBM15	NUTM2B-AS1	0.708865	1.89205e-83	postive
RBM15	AC016586.1	0.74222	2.09891e-95	postive
RBM15	LINC01473	0.754119	3.96348e-100	postive
RBM15	AC016747.3	0.726516	1.48313e-89	postive
RBM15	LINC01409	0.713144	6.9083e-85	postive
RBM15	AC027796.5	0.71339	5.69675e-85	postive
RBM15	AL133243.3	0.727789	5.15627e-90	postive
RBM15	ETV5-AS1	0.728656	2.50192e-90	postive
RBM15	AC011825.2	0.70222	2.87088e-81	postive
RBM15	AC110296.1	0.730958	3.61986e-91	postive
RBM15	AC093690.1	0.73006	7.71592e-91	postive
RBM15	AL157402.2	0.737734	1.08602e-93	postive
RBM15	AC026124.2	0.719801	3.54383e-87	postive
RBM15	AC012254.3	0.722578	3.75343e-88	postive
RBM15	N4BP2L2-IT2	0.705582	2.30154e-82	postive
METTL3	AL139287.1	0.752181	2.43109e-99	postive
RBM15	COL18A1-AS2	0.755386	1.20027e-100	postive
RBM15	AC068533.3	0.70966	1.02731e-83	postive
RBM15	Z68871.1	0.747297	2.18224e-97	postive
RBM15	CDC42-IT1	0.706278	1.35958e-82	postive
RBM15	AL157786.1	0.715088	1.50497e-85	postive
RBM15	RPL34-AS1	0.721098	1.24624e-87	postive
RBM15	AC016405.1	0.700948	7.39464e-81	postive
RBM15	AL110115.1	0.748217	9.42718e-98	postive
METTL3	AL022328.2	0.723038	2.58169e-88	postive
RBM15	AC087277.2	0.757269	2.00574e-101	postive
RBM15	AC025031.4	0.725611	3.13422e-89	postive
RBM15	AC080162.1	0.758088	9.15687e-102	postive
RBM15	AF117829.1	0.701859	3.75645e-81	postive
METTL3	AC138028.4	0.703617	1.01035e-81	postive
METTL3	SNHG20	0.743368	7.54497e-96	postive
METTL3	AC109460.2	0.702718	1.98014e-81	postive
RBM15	DIP2A-IT1	0.701967	3.4674e-81	postive
RBM15	AL133342.1	0.718055	1.43404e-86	postive
RBM15	AC004492.1	0.701781	3.98153e-81	postive
RBM15	KCNMA1-AS3	0.735397	8.21615e-93	postive
RBM15	AC100821.2	0.702181	2.95531e-81	postive
RBM15	AC073326.1	0.721269	1.08498e-87	postive
METTL3	RUSC1-AS1	0.730894	3.82142e-91	postive
RBM15	AL133230.2	0.705956	1.73424e-82	postive
RBM15	COL18A1-AS1	0.717435	2.34795e-86	postive
RBM15	AC136424.1	0.730215	6.77158e-91	postive
RBM15	AC087749.1	0.725903	2.46162e-89	postive
RBM15	AC078778.1	0.758942	4.03242e-102	postive
RBM15	AC007598.1	0.736204	4.09595e-93	postive
RBM15	AC068790.3	0.733611	3.80505e-92	postive
RBM15	AC012409.2	0.731817	1.75107e-91	postive
RBM15	SLC16A12-AS1	0.713024	7.58141e-85	postive
RBM15	MIR17HG	0.712698	9.77686e-85	postive
METTL3	AC007066.2	0.752302	2.17304e-99	postive
RBM15	AC092574.2	0.718235	1.24164e-86	postive
RBM15	AL050343.3	0.702715	1.98466e-81	postive
RBM15	AC090181.2	0.712276	1.35837e-84	postive
RBM15	AL731568.1	0.70731	6.2057e-83	postive
RBM15	AL512506.1	0.705479	2.48773e-82	postive
RBM15	AC015853.3	0.723608	1.62184e-88	postive
RBM15	AL359922.2	0.724861	5.80767e-89	postive
RBM15	AC025043.1	0.710198	6.78964e-84	postive
RBM15	KANSL1L-AS1	0.732666	8.51174e-92	postive
RBM15	AC107241.1	0.724607	7.15481e-89	postive
RBM15	AP001178.2	0.738105	7.85865e-94	postive
RBM15	AL021937.3	0.725496	3.445e-89	postive
RBM15	AC008264.2	0.706139	1.51066e-82	postive
RBM15	CLMAT3	0.716449	5.1347e-86	postive
RBM15	AP005131.1	0.74229	1.97212e-95	postive
RBM15	AC022898.2	0.728374	3.16687e-90	postive
RBM15	CFLAR-AS1	0.758201	8.22178e-102	postive
RBM15	AC092653.1	0.714448	2.48832e-85	postive
RBM15	AC005540.1	0.747372	2.03943e-97	postive
RBM15	AC108102.1	0.741319	4.66996e-95	postive
RBM15	AC087286.2	0.787903	3.70493e-115	postive
RBM15	PSMD6-AS2	0.741242	4.99835e-95	postive
RBM15	AC090186.1	0.707046	7.58311e-83	postive
RBM15	AC073367.1	0.718306	1.17314e-86	postive
RBM15	EML4-AS1	0.748219	9.41716e-98	postive
RBM15	TBL1XR1-AS1	0.742331	1.90213e-95	postive
RBM15	TTN-AS1	0.725246	4.23322e-89	postive
METTL3	SEMA3F-AS1	0.711285	2.93191e-84	postive
METTL3	AC084018.1	0.718033	1.4587e-86	postive
RBM15	AL355916.2	0.731757	1.8419e-91	postive
RBM15	ITPRIP-AS1	0.726979	1.01108e-89	postive
RBM15	AP005131.5	0.715364	1.21007e-85	postive
RBM15	SNHG22	0.735517	7.40942e-93	postive
RBM15	AC004832.5	0.705585	2.29666e-82	postive
RBM15	AC079866.2	0.703958	7.82226e-82	postive
RBM15	AP003043.1	0.760023	1.42067e-102	postive
METTL3	AC006435.2	0.727779	5.19929e-90	postive
RBM15	AC036103.1	0.714809	1.87371e-85	postive
METTL3	PTOV1-AS2	0.722284	4.76685e-88	postive
RBM15	DHDDS-AS1	0.716519	4.86068e-86	postive
RBM15	PLCB1-IT1	0.716573	4.65553e-86	postive
RBM15	AC116158.1	0.765095	9.86422e-105	postive
RBM15	ZRANB2-AS2	0.769133	1.7234e-106	postive
METTL3	AC005253.1	0.712712	9.67469e-85	postive
RBM15	AC068790.6	0.733527	4.08742e-92	postive
RBM15	AC004832.4	0.731873	1.66964e-91	postive
